# Supplementary material for: Accelerated Mobilization of Organic Carbon from Retrogressive Thaw Slumps on the Northern Taymyr Peninsula
Source: Copernicus journal article supplement (doi:10.5194/tc-2022-36), 2022-02-21
Supplement: Supplementary file [file tc-2022-36-AC2-supplement.pdf]

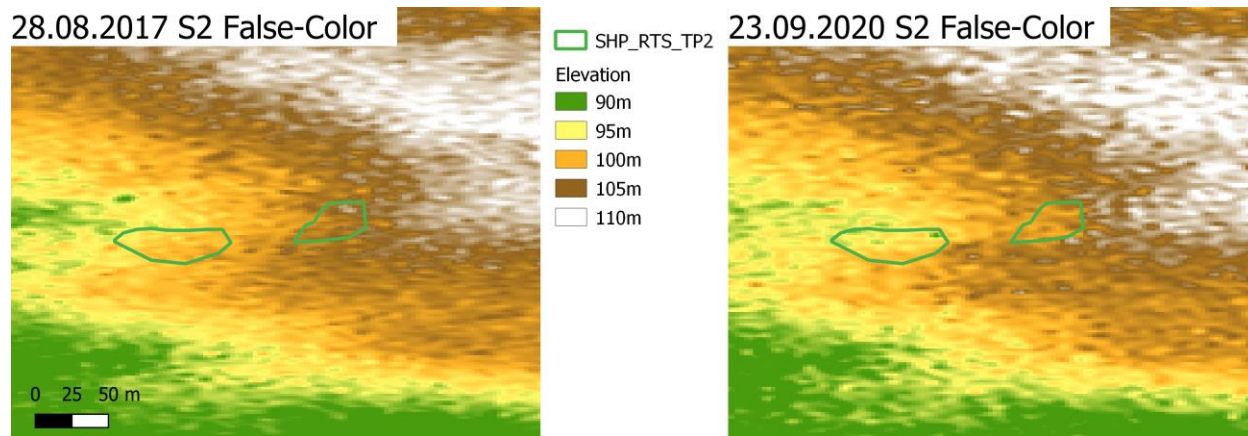

Figure 1: Left: DEM generated in winter 2017/18, Right: DEM generated in Winter 2010/21

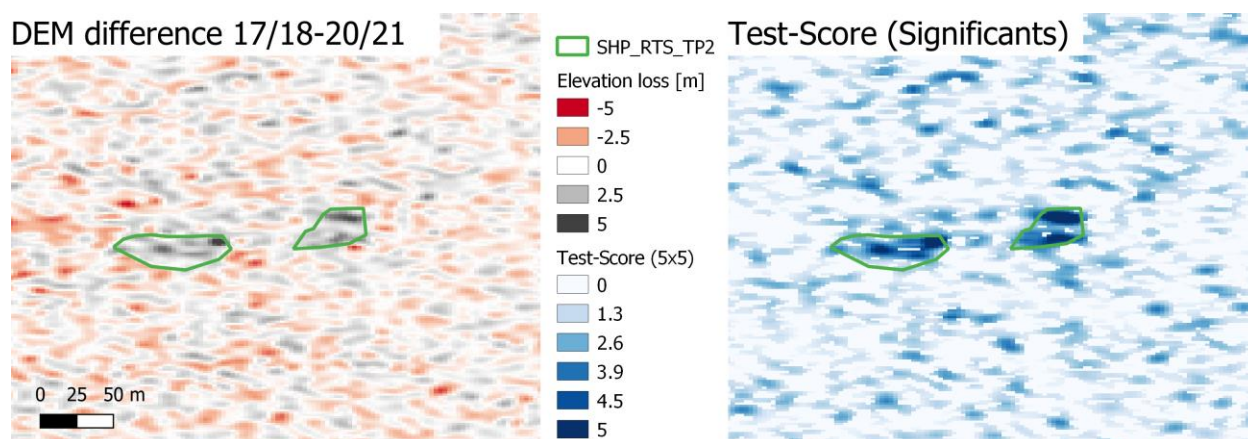

Figure 2: Left: DEM difference between winter 2017/18 and winter 2020/21, Right: Test (Significant) Score using a 5x5 moving window. This takes into account the the errors in the elevation measurements (see Bernhard et al. 2020 for a detailed explanation of the Test-Score).

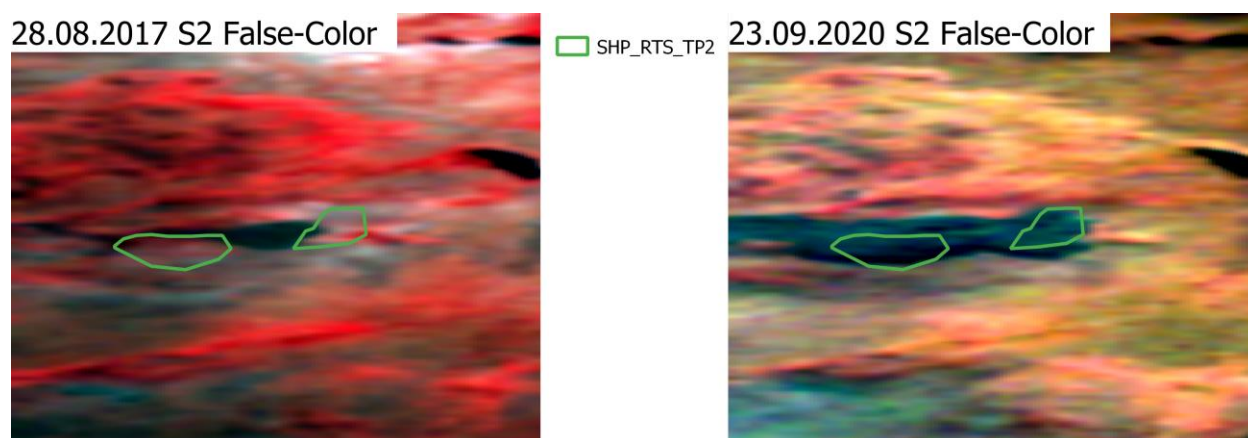

Figure 3: Left: Sentinel-2 False color image taken on 28.08.2017 (before the first dem), Right: Sentinel-2 False color image taken on 23.09.2020 (end of summer before second DEM)
