# Supplementary material for: Accelerated Mobilization of Organic Carbon from Retrogressive Thaw Slumps on the Northern Taymyr Peninsula
Source: Copernicus journal article supplement (doi:10.5194/tc-2022-36), 2022-02-21

**1075 and 1074 polygons. Screenshots of Planet September 2020**

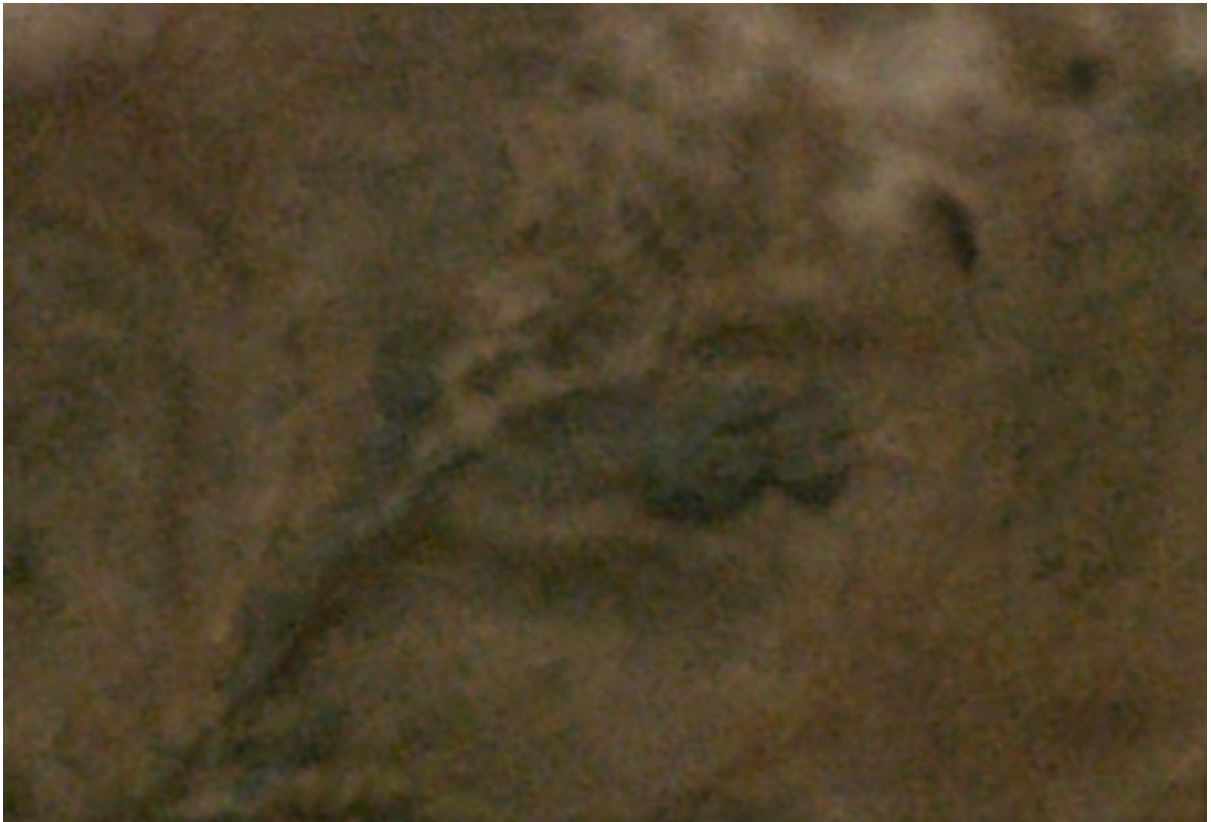

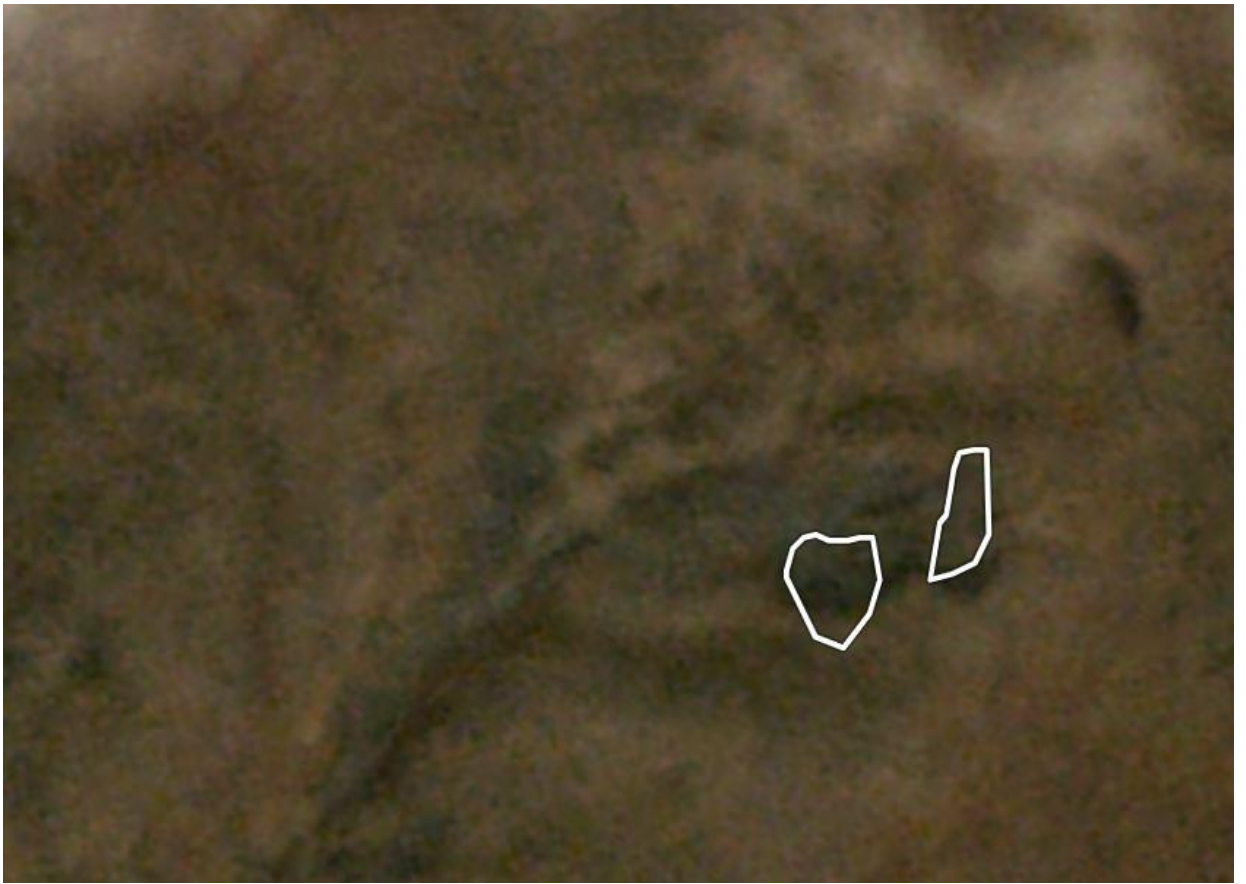

Supplement: Supplementary file [file tc-2022-36-RC2-supplement.pdf]
